# Supplementary figures and images for: Coding of chromatic spatial contrast by macaque V1 neurons
Source: eLife journal article supplement (doi:10.7554/elife.68133), 2022-02-11

A.

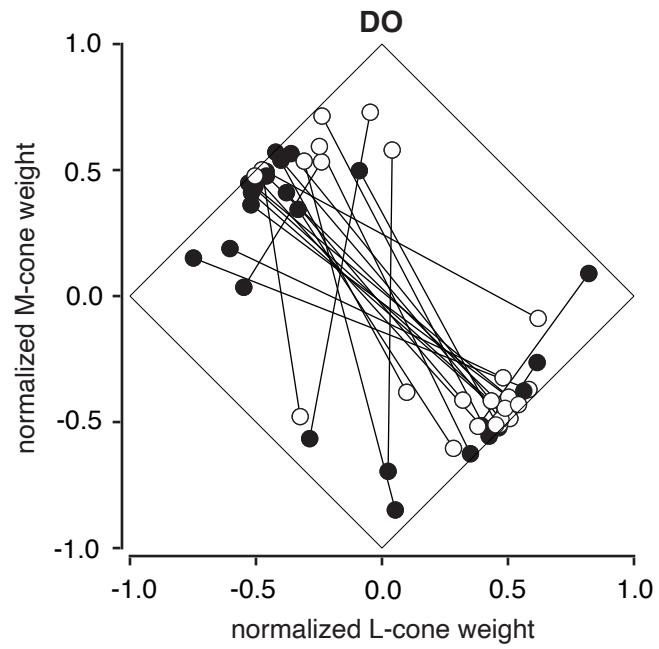

B.

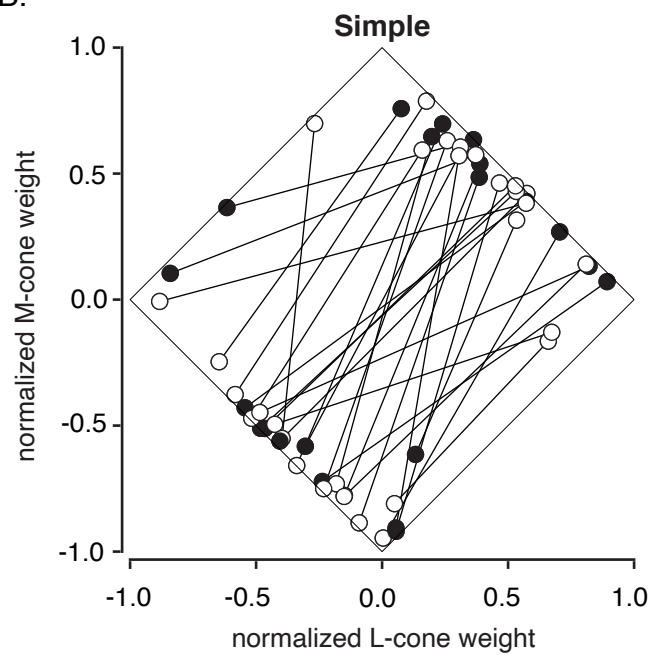

Supplement: supp [file elife-68133-supp-v1.zip]
